# Supplementary material
Source: ML conference proceedings conference paper supplement (https://openaccess.thecvf.com/content/CVPR_2020/html/Lin_Shoestring_Graph-Based_Semi-Supervised_CVPR_2020_paper.html)
Supplement: Supplementary file 1 [file Lin_Shoestring_Graph-Based_Semi-Supervised_CVPR_2020_supplemental.pdf]

Table 1: Document classification accuracy on citation networks with L1 distance (%).

| Label Rate<br>Dataset    | 1 label per class     |                       |                       |                       | 2 labels per class    |                       |                       |                       | 5 labels per class    |                       |                       |                       |
|--------------------------|-----------------------|-----------------------|-----------------------|-----------------------|-----------------------|-----------------------|-----------------------|-----------------------|-----------------------|-----------------------|-----------------------|-----------------------|
|                          | Cora                  | CiteSeer              | PubMed                | Large Cora            | Cora                  | CiteSeer              | PubMed                | Large Cora            | Cora                  | CiteSeer              | PubMed                | Large Cora            |
| <i>Shoestring-L1</i> GCN | 58.2 <sub>(1.2)</sub> | 47.9 <sub>(1.4)</sub> | 61.4 <sub>(5.4)</sub> | 44.8 <sub>(4.8)</sub> | 65.7 <sub>(1.1)</sub> | 54.2 <sub>(1.4)</sub> | 64.4 <sub>(5.4)</sub> | 52.0 <sub>(4.6)</sub> | 72.7 <sub>(1.1)</sub> | 60.5 <sub>(1.4)</sub> | 71.1 <sub>(5.4)</sub> | 60.2 <sub>(4.6)</sub> |
| IGCN <sub>(RNM)</sub>    | 66.6 <sub>(1.3)</sub> | 53.7 <sub>(1.5)</sub> | 62.3 <sub>(5.7)</sub> | 51.3 <sub>(5.0)</sub> | 71.1 <sub>(1.2)</sub> | 59.2 <sub>(1.5)</sub> | 67.1 <sub>(5.7)</sub> | 54.6 <sub>(5.0)</sub> | 74.9 <sub>(1.2)</sub> | 63.3 <sub>(1.5)</sub> | 72.1 <sub>(5.6)</sub> | 59.6 <sub>(5.0)</sub> |
| IGCN <sub>(AR)</sub>     | 67.0 <sub>(2.4)</sub> | 52.6 <sub>(2.5)</sub> | 63.6 <sub>(8.2)</sub> | 51.5 <sub>(8.9)</sub> | 71.7 <sub>(2.2)</sub> | 58.9 <sub>(2.5)</sub> | 68.0 <sub>(8.4)</sub> | 54.6 <sub>(8.9)</sub> | 74.6 <sub>(2.2)</sub> | 63.5 <sub>(2.5)</sub> | 72.8 <sub>(8.1)</sub> | 59.2 <sub>(8.9)</sub> |
| GLP <sub>(RNM)</sub>     | 62.2 <sub>(0.9)</sub> | 49.6 <sub>(1.0)</sub> | 61.1 <sub>(1.1)</sub> | 45.8 <sub>(2.6)</sub> | 68.7 <sub>(0.8)</sub> | 57.3 <sub>(1.0)</sub> | 66.9 <sub>(1.1)</sub> | 52.3 <sub>(2.6)</sub> | 73.0 <sub>(0.8)</sub> | 62.4 <sub>(1.0)</sub> | 72.0 <sub>(1.1)</sub> | 57.8 <sub>(2.6)</sub> |
| GLP <sub>(AR)</sub>      | 62.4 <sub>(4.0)</sub> | 49.7 <sub>(17)</sub>  | 63.3 <sub>(8.0)</sub> | 46.2 <sub>(26)</sub>  | 69.1 <sub>(3.8)</sub> | 58.2 <sub>(17)</sub>  | 68.2 <sub>(7.9)</sub> | 52.8 <sub>(27)</sub>  | 73.3 <sub>(3.8)</sub> | 63.0 <sub>(17)</sub>  | 72.9 <sub>(7.8)</sub> | 59.2 <sub>(27)</sub>  |

Table 2: Document classification accuracy on citation networks for 3, 4, 20 labeled data (%).

| Label Rate<br>Dataset    | 3 labels per class    |                       |                       |                       | 4 labels per class    |                       |                       |                       | 20 labels per class   |                       |                       |                       |
|--------------------------|-----------------------|-----------------------|-----------------------|-----------------------|-----------------------|-----------------------|-----------------------|-----------------------|-----------------------|-----------------------|-----------------------|-----------------------|
|                          | Cora                  | CiteSeer              | PubMed                | Large Cora            | Cora                  | CiteSeer              | PubMed                | Large Cora            | Cora                  | CiteSeer              | PubMed                | Large Cora            |
| LP                       | 55.7 <sub>(0.1)</sub> | 38.5 <sub>(0.1)</sub> | 60.3 <sub>(0.2)</sub> | 39.3 <sub>(0.3)</sub> | 57.4 <sub>(0.1)</sub> | 40.3 <sub>(0.1)</sub> | 62.3 <sub>(0.2)</sub> | 41.3 <sub>(0.3)</sub> | 67.8 <sub>(0.1)</sub> | 47.7 <sub>(0.1)</sub> | 73.3 <sub>(0.2)</sub> | 52.5 <sub>(0.3)</sub> |
| GCN                      | 61.0 <sub>(0.6)</sub> | 48.2 <sub>(0.9)</sub> | 64.9 <sub>(4.8)</sub> | 44.9 <sub>(3.9)</sub> | 65.8 <sub>(0.6)</sub> | 53.7 <sub>(0.9)</sub> | 67.3 <sub>(4.8)</sub> | 48.9 <sub>(3.8)</sub> | 79.8 <sub>(0.7)</sub> | 68.1 <sub>(0.9)</sub> | 78.0 <sub>(5.4)</sub> | 67.4 <sub>(3.8)</sub> |
| ST-CT                    | 69.7 <sub>(5.5)</sub> | 58.5 <sub>(8.6)</sub> | 66.0 <sub>(51)</sub>  | 47.4 <sub>(37)</sub>  | 72.0 <sub>(5.6)</sub> | 62.6 <sub>(8.7)</sub> | 68.7 <sub>(52)</sub>  | 50.9 <sub>(37)</sub>  | 80.1 <sub>(5.8)</sub> | 70.1 <sub>(9.1)</sub> | 77.6 <sub>(54)</sub>  | 66.0 <sub>(18)</sub>  |
| IGCN <sub>(RNM)</sub>    | 64.8 <sub>(0.6)</sub> | 49.6 <sub>(0.9)</sub> | 66.1 <sub>(4.9)</sub> | 47.5 <sub>(4.2)</sub> | 69.1 <sub>(0.6)</sub> | 53.9 <sub>(0.9)</sub> | 68.0 <sub>(4.9)</sub> | 53.5 <sub>(4.2)</sub> | 80.9 <sub>(0.7)</sub> | 68.4 <sub>(1.0)</sub> | 77.6 <sub>(5.5)</sub> | 68.5 <sub>(3.9)</sub> |
| IGCN <sub>(AR)</sub>     | 65.7 <sub>(1.0)</sub> | 50.2 <sub>(1.2)</sub> | 66.9 <sub>(5.7)</sub> | 49.2 <sub>(8.8)</sub> | 70.0 <sub>(0.9)</sub> | 54.5 <sub>(1.2)</sub> | 68.7 <sub>(5.7)</sub> | 53.7 <sub>(8.8)</sub> | 81.3 <sub>(1.4)</sub> | 68.6 <sub>(1.7)</sub> | 78.5 <sub>(8.5)</sub> | 68.8 <sub>(6.4)</sub> |
| GLP <sub>(RNM)</sub>     | 66.6 <sub>(0.4)</sub> | 53.2 <sub>(0.7)</sub> | 65.4 <sub>(0.7)</sub> | 48.2 <sub>(2.2)</sub> | 68.9 <sub>(0.4)</sub> | 56.2 <sub>(0.7)</sub> | 68.1 <sub>(0.8)</sub> | 53.4 <sub>(2.2)</sub> | 80.7 <sub>(0.3)</sub> | 67.7 <sub>(0.4)</sub> | 77.7 <sub>(0.4)</sub> | 68.1 <sub>(1.5)</sub> |
| GLP <sub>(AR)</sub>      | 65.9 <sub>(4.0)</sub> | 53.2 <sub>(19)</sub>  | 67.1 <sub>(9.2)</sub> | 50.5 <sub>(26)</sub>  | 68.5 <sub>(4.0)</sub> | 56.3 <sub>(19)</sub>  | 69.5 <sub>(9.0)</sub> | 53.0 <sub>(26)</sub>  | 81.2 <sub>(1.8)</sub> | 68.4 <sub>(8.6)</sub> | 78.8 <sub>(3.9)</sub> | 68.7 <sub>(13)</sub>  |
| <i>Shoestring-L2</i> GCN | 69.1 <sub>(0.9)</sub> | 61.3 <sub>(1.3)</sub> | 65.8 <sub>(5.7)</sub> | 55.4 <sub>(4.1)</sub> | 71.5 <sub>(0.9)</sub> | 62.8 <sub>(1.4)</sub> | 67.3 <sub>(6.3)</sub> | 57.2 <sub>(4.6)</sub> | 80.1 <sub>(1.1)</sub> | 69.2 <sub>(1.4)</sub> | 77.6 <sub>(6.2)</sub> | 67.9 <sub>(4.4)</sub> |
| IGCN <sub>(RNM)</sub>    | 73.5 <sub>(1.1)</sub> | 63.9 <sub>(1.4)</sub> | 66.0 <sub>(6.3)</sub> | 59.4 <sub>(4.5)</sub> | 75.2 <sub>(1.1)</sub> | 65.0 <sub>(1.5)</sub> | 69.3 <sub>(6.9)</sub> | 60.5 <sub>(5.0)</sub> | 80.8 <sub>(1.1)</sub> | 69.3 <sub>(1.4)</sub> | 77.1 <sub>(6.4)</sub> | 68.4 <sub>(4.5)</sub> |
| IGCN <sub>(AR)</sub>     | 74.0 <sub>(2.4)</sub> | 64.4 <sub>(2.7)</sub> | 67.0 <sub>(11)</sub>  | 59.8 <sub>(8.5)</sub> | 75.3 <sub>(2.4)</sub> | 65.4 <sub>(3.1)</sub> | 70.0 <sub>(13)</sub>  | 60.5 <sub>(9.5)</sub> | 81.0 <sub>(2.0)</sub> | 69.5 <sub>(2.4)</sub> | 77.7 <sub>(9.4)</sub> | 68.4 <sub>(6.8)</sub> |
| GLP <sub>(RNM)</sub>     | 73.2 <sub>(0.6)</sub> | 63.2 <sub>(0.7)</sub> | 65.5 <sub>(0.8)</sub> | 58.2 <sub>(2.2)</sub> | 74.6 <sub>(0.6)</sub> | 64.2 <sub>(1.0)</sub> | 67.9 <sub>(1.2)</sub> | 59.0 <sub>(3.4)</sub> | 80.6 <sub>(0.7)</sub> | 68.5 <sub>(0.8)</sub> | 76.8 <sub>(0.9)</sub> | 67.7 <sub>(2.2)</sub> |
| GLP <sub>(AR)</sub>      | 74.0 <sub>(3.8)</sub> | 63.7 <sub>(16)</sub>  | 67.4 <sub>(7.6)</sub> | 59.6 <sub>(26)</sub>  | 75.4 <sub>(3.8)</sub> | 64.7 <sub>(19)</sub>  | 69.0 <sub>(10)</sub>  | 60.4 <sub>(34)</sub>  | 81.3 <sub>(2.5)</sub> | 69.0 <sub>(10)</sub>  | 78.3 <sub>(5.2)</sub> | 68.3 <sub>(16)</sub>  |
| <i>Shoestring-L2</i> GCN | 70.4 <sub>(1.2)</sub> | 58.6 <sub>(1.5)</sub> | 66.9 <sub>(6.0)</sub> | 57.7 <sub>(4.7)</sub> | 72.1 <sub>(1.3)</sub> | 60.7 <sub>(1.5)</sub> | 69.4 <sub>(6.2)</sub> | 60.1 <sub>(4.8)</sub> | 80.7 <sub>(1.2)</sub> | 68.6 <sub>(1.5)</sub> | 78.9 <sub>(6.0)</sub> | 70.5 <sub>(4.7)</sub> |
| IGCN <sub>(RNM)</sub>    | 74.3 <sub>(1.3)</sub> | 61.2 <sub>(1.7)</sub> | 69.4 <sub>(6.6)</sub> | 60.0 <sub>(5.1)</sub> | 75.7 <sub>(1.4)</sub> | 63.0 <sub>(1.6)</sub> | 71.0 <sub>(6.8)</sub> | 61.0 <sub>(5.2)</sub> | 81.4 <sub>(1.4)</sub> | 68.7 <sub>(1.6)</sub> | 78.2 <sub>(6.2)</sub> | 70.4 <sub>(4.8)</sub> |
| IGCN <sub>(AR)</sub>     | 74.5 <sub>(2.8)</sub> | 61.7 <sub>(3.1)</sub> | 70.1 <sub>(12)</sub>  | 60.0 <sub>(9.6)</sub> | 76.0 <sub>(2.8)</sub> | 63.3 <sub>(3.0)</sub> | 71.8 <sub>(12)</sub>  | 60.9 <sub>(9.3)</sub> | 81.7 <sub>(2.8)</sub> | 68.9 <sub>(2.4)</sub> | 78.8 <sub>(8.9)</sub> | 69.9 <sub>(6.7)</sub> |
| GLP <sub>(RNM)</sub>     | 73.8 <sub>(0.9)</sub> | 60.3 <sub>(1.1)</sub> | 69.2 <sub>(1.2)</sub> | 69.0 <sub>(3.0)</sub> | 74.8 <sub>(0.9)</sub> | 61.7 <sub>(1.0)</sub> | 70.5 <sub>(1.2)</sub> | 59.9 <sub>(2.9)</sub> | 81.0 <sub>(0.9)</sub> | 67.9 <sub>(0.9)</sub> | 78.1 <sub>(1.0)</sub> | 69.8 <sub>(2.1)</sub> |
| GLP <sub>(AR)</sub>      | 74.5 <sub>(4.1)</sub> | 60.7 <sub>(17)</sub>  | 70.3 <sub>(8.1)</sub> | 60.3 <sub>(28)</sub>  | 75.9 <sub>(4.0)</sub> | 62.4 <sub>(17)</sub>  | 71.7 <sub>(8.5)</sub> | 61.5 <sub>(27)</sub>  | 81.9 <sub>(2.1)</sub> | 68.6 <sub>(9.0)</sub> | 79.7 <sub>(4.4)</sub> | 70.1 <sub>(14)</sub>  |
| <i>Shoestring-L1</i> GCN | 69.0 <sub>(1.1)</sub> | 57.8 <sub>(1.4)</sub> | 66.9 <sub>(5.4)</sub> | 55.9 <sub>(4.6)</sub> | 71.1 <sub>(1.1)</sub> | 59.7 <sub>(1.4)</sub> | 70.0 <sub>(5.4)</sub> | 58.3 <sub>(4.6)</sub> | 80.0 <sub>(1.2)</sub> | 67.9 <sub>(1.5)</sub> | 78.2 <sub>(5.6)</sub> | 68.7 <sub>(4.7)</sub> |
| IGCN <sub>(RNM)</sub>    | 72.8 <sub>(1.2)</sub> | 61.2 <sub>(1.5)</sub> | 69.0 <sub>(5.6)</sub> | 57.0 <sub>(5.0)</sub> | 73.6 <sub>(1.2)</sub> | 62.6 <sub>(1.5)</sub> | 71.5 <sub>(5.6)</sub> | 58.6 <sub>(5.0)</sub> | 80.0 <sub>(1.2)</sub> | 67.8 <sub>(1.5)</sub> | 77.9 <sub>(5.7)</sub> | 68.6 <sub>(4.9)</sub> |
| IGCN <sub>(AR)</sub>     | 73.2 <sub>(2.2)</sub> | 60.3 <sub>(2.5)</sub> | 69.9 <sub>(8.1)</sub> | 56.7 <sub>(8.9)</sub> | 73.8 <sub>(2.2)</sub> | 62.5 <sub>(2.5)</sub> | 72.1 <sub>(8.1)</sub> | 58.1 <sub>(8.9)</sub> | 79.9 <sub>(1.8)</sub> | 68.5 <sub>(2.1)</sub> | 78.5 <sub>(7.0)</sub> | 67.3 <sub>(6.9)</sub> |
| GLP <sub>(RNM)</sub>     | 70.9 <sub>(0.8)</sub> | 59.6 <sub>(1.0)</sub> | 69.0 <sub>(1.1)</sub> | 54.7 <sub>(2.6)</sub> | 71.8 <sub>(0.8)</sub> | 61.7 <sub>(1.0)</sub> | 71.3 <sub>(1.1)</sub> | 57.0 <sub>(2.6)</sub> | 79.1 <sub>(0.9)</sub> | 67.4 <sub>(1.0)</sub> | 77.5 <sub>(1.0)</sub> | 67.0 <sub>(2.2)</sub> |
| GLP <sub>(AR)</sub>      | 71.6 <sub>(3.8)</sub> | 60.3 <sub>(16)</sub>  | 70.2 <sub>(7.8)</sub> | 56.3 <sub>(27)</sub>  | 72.6 <sub>(3.7)</sub> | 62.2 <sub>(16)</sub>  | 72.8 <sub>(7.8)</sub> | 58.3 <sub>(26)</sub>  | 79.3 <sub>(2.5)</sub> | 67.7 <sub>(9.0)</sub> | 79.1 <sub>(4.6)</sub> | 67.5 <sub>(14)</sub>  |
